# A New Genus of Fleas with Associated Microorganisms in Dominican Amber

GEORGE POINAR, JR.<sup>1</sup>

Department of Integrative Biology, Oregon State University, Corvallis, OR 97331.

J. Med. Entomol. 52(6): 1234–1240 (2015); DOI: 10.1093/jme/tjv134

Version of Record, first published online September 15, 2015 with fixed content and layout in compliance with Art. 8.1.3.2 ICZN.

**ABSTRACT** A flea preserved in Dominican amber is described as *Atopopsyllus cionus*, n. gen., n. sp. (Atopopsyllini n. tribe, Spilopsyllinae, Pulicidae). The male specimen has two unique characters that have not been noted in previous extant or extinct fleas, thus warranting its tribal status. These characters are five-segmented maxillary palps and cerci-like organs on abdominal tergite X. Additional characters are the absence of ctenidia, very small eyes, a lanceolate terminal segment of the maxillary palps, legs with six notches on the dorsal margin of the tibiae, five pairs of lateral plantar bristles on the distitarsomeres, and nearly straight ungues with a wide space between the basal lobe and tarsal claw. Trypanosomes and coccobacilli in the rectum and coccobacilli on the tip of the epipharynx of the fossil are depicted and briefly characterized.

**KEY WORDS** fossil flea, *Atopopsyllus cionus*, n. gen., n. sp., five-segmented maxillary palps, associated microorganisms

Fossil fleas are rare and aside from some primitive flea-like arthropods described from Cretaceous deposits, all “modern” fleas have been described in Baltic and Dominican amber (Poinar 1995). An extensive molecular phylogenetic study involving 259 flea taxa suggested that the common ancestor of all extant fleas diversified during the Cretaceous, while the majority of the intra-ordinal divergences occurred in the Paleogene (Zhu et al. 2015).

The male Dominican amber flea described here was originally identified as belonging to the extant genus *Rhopalopsyllus* Baker (Poinar 1995). However, a re-investigation showed that this flea is not a member of the family Rhopalopsyllidae and has unique features that warrant new tribal status. These properties are five-segmented maxillary palps and a pair of cerci-like organs positioned on tergite-X near the tip of the abdomen. A description follows, accompanied with a brief characterization of trypanosomes and coccobacilli associated with the fossil.

## Materials and Methods

The fossil originated from amber mines in the northern mountain range (Cordillera Septentrional) of the Dominican Republic between Puerto Plata and Santiago. Amber from mines in this region was produced by *Hymenaea protera* Poinar (1991) (Fabaceae), and the Dominican amber forest was characterized as a tropical moist forest based on biota recovered from the amber (Poinar and Poinar 1999).

Dating of Dominican amber is controversial, with the youngest proposed age of 20–15 mya based on Foraminifera (Iturralde-Vinent and MacPhee 1996) and the oldest of 45–30 mya based on coccoliths (Cêpek in Schlee 1990). These are minimum dates, as they are based on microfossils in the strata containing the amber. Most of the amber was secondarily deposited in turbiditic sandstones of the Upper Eocene to Lower Miocene Mamey Group (Draper et al. 1994). Dating is further complicated by the discovery of Early Oligocene amber in Puerto Rico and Maastrichtian-Paleocene amber in Jamaica (Iturralde-Vinent 2001), showing that amber from a range of deposits occurs in the Greater Antilles.

Observations and photographs were made with a Nikon SMZ-10 R stereoscopic microscope and Nikon Optiphot compound microscope with magnifications up to 600×. Helicon Focus Pro X64 was used to stack photos for better clarity and depth of field.

## Nomenclature

This paper and the nomenclatural act it contains have been registered in Zoobank (www.zoobank.com), the official register of the International Commission on Zoological Nomenclature. The LSID (Life Science Identifier) number of the publication is: E70F6ED6-2A34-4900-92CC-C990F56BE271.

## Results

Characters of the fossil flea that place it in the subfamily Spilopsyllinae include—dorsal abdominal segments with only a single transverse row of bristles,

<sup>1</sup> Corresponding author, e-mail: poinarg@scice.oregonstate.edu.

thorax above longer than the first abdominal segment, and the absence of a frontal-epicranial suture (Ewing 1929, Brues et al. 1954, Medvedev 1998).

Order Siphonaptera

Family Pulicidae

Subfamily Spilopsyllinae

Tribe Atopopsyllini n. tribe

Diagnosis: Same as type species since monotypic.

Type genus: *Atopopsyllus* n. gen.

Diagnosis: Same as type species since monotypic.

Type species: *Atopopsyllus cionus*, n. gen., n. sp.

***Atopopsyllus cionus*, n. gen., n. sp.**

(Figs. 1–9)

(urn:lsid:zoobank.org:act:E70F6ED6-2A34-4900-92CC-C990F56BE271)

**Diagnosis.** The fossil is characterized by five-segmented maxillary palps and a pair of cerci-like organs positioned near the tip of the abdomen. Additional features include the absence of ctenidia, small eyes, legs with femoro-tibial joints each bearing one short and one long guard seta, the dorsal margins of the tibiae bearing five notches for the insertion of bristles, four pairs of lateral plantar bristles and one pair of setae on the distitarsomeres, with terminal bristles the shortest, tarsal claws almost straight, with a wide opening between the tarsal claw and the basal lobe of unguis and sensillum bordered by three tubercles.

**Description.** *Head.* Anterior margin of head without frontal tubercle, evenly rounded from its dorsal base to coxa I. Interantennal suture (falx)

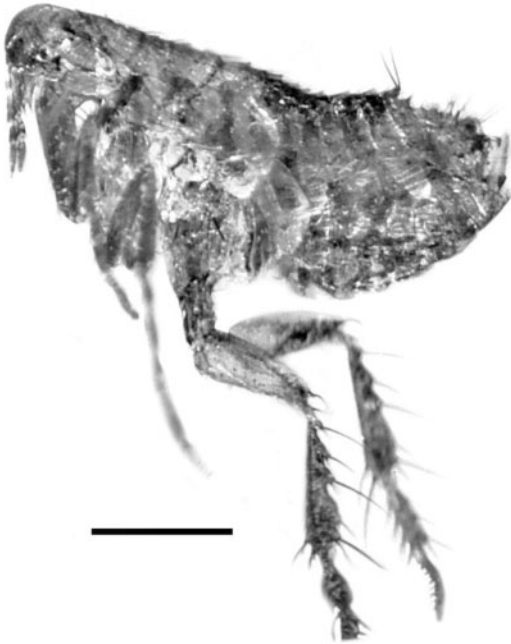

**Fig. 1.** Lateral view of *Atopopsyllus cionus*, n. gen., n. sp. in Dominican amber. Scale bar = 465  $\mu$ m.

inconspicuous. No sclerotized demarcation of cephalic capsule between occipito-frontal and genal zones. Antennal fossa well developed, 282  $\mu$ m long; antennal club symmetrical, cone-shaped, with nine segments gradually decreasing in size, length, 240  $\mu$ m; scape and pedicel half as wide as basal club segment; eye small, inserted medially between frontal margin and gena; genal apex lacking process or tooth. Maxillary palps five-segmented; lengths of segments, I = 35  $\mu$ m, II = 46  $\mu$ m, III = 116  $\mu$ m, IV = 92  $\mu$ m, V = 127  $\mu$ m; segment V sublanceolate, tapering to point (Figs. 2 and 9). Labial palps and epipharynx hidden by coxa I. Chaetotaxy: three occipital rows, anterior row with four setae, middle row with four setae, posterior row with four setae; three occipital frontal/genal rows, anterior row with four setae, second row with three setae (including one very long ocular bristle), and third posterior row (beneath eye) with three setae.

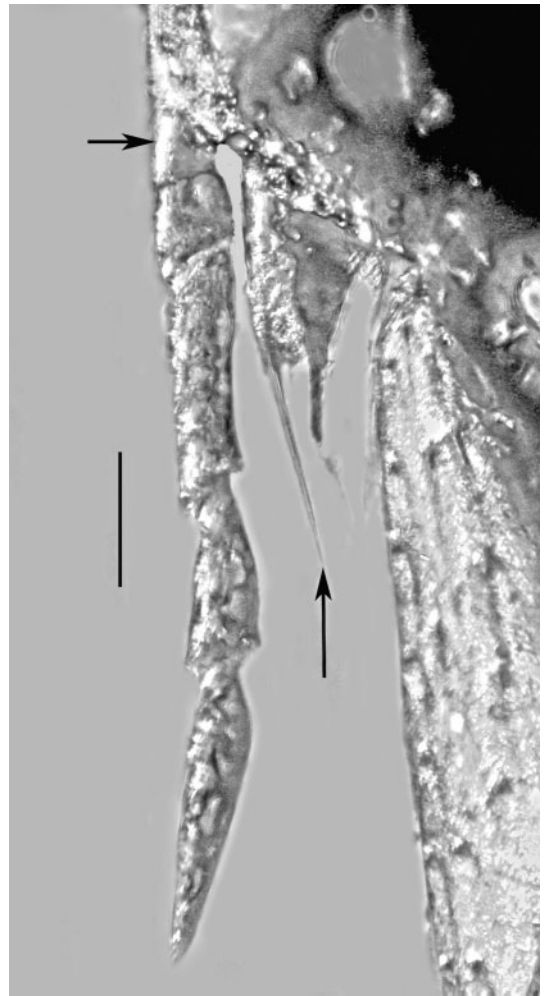

**Fig. 2.** Left maxillary palp of *Atopopsyllus cionus*, n. gen., n. sp. in Dominican amber. Scale bar = 65  $\mu$ m. Upper arrow shows extra (fifth) segment. Lower arrow shows tip of ocular seta.

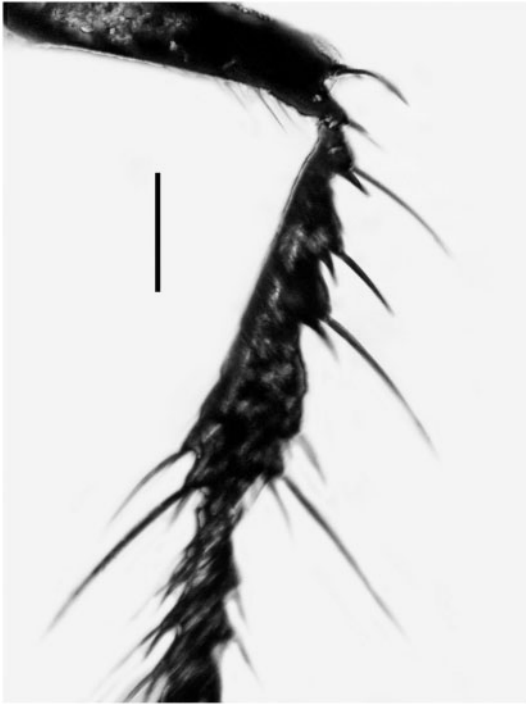

**Fig. 3.** Metatibia of *Atoposyllus cionus*, n. gen., n. sp. in Dominican amber. Scale bar = 70  $\mu\text{m}$ .

**Thorax.** Pronotum not separated from head capsule, similar to mesonotum in bearing median row of four long stiff setae. Cervical link plate present. Metanotum dorsally equal in width to that of preceding segment, with similar chaetotaxy. Pro-, meso-, and metathoracic femora and tibiae nearly identical except for size and arrangement of femoro-tibial guard setae. Femoro-tibial joints each with one long and one short guard seta (Fig. 3). Dorsal margin of metatibia (length, 475  $\mu\text{m}$ ) with five notches, each bearing paired stout setae; ventral margin of tibia with two stout apical setae; tarsi five-segmented with tarsomeres not notched; pro and mid tarsomeres slender, elongate with tarsomeres II and V longest and tarsomere IV shortest, less than half length of tarsomeres II and V (Fig. 4); basal tarsomeres (length with claw, 265  $\mu\text{m}$ ), with five pairs of ventral setae with terminal pair shorter and thicker than remainder (Fig. 4). Tarsal claws long, nearly straight, bearing coarse, minute projections basally; basal lobe third as long as claw, triangular, lacking serrations (Figs. 5 and 6).

Abdomen longer than high, tergites I–V with row of five setae on each side; tergite VII with paired antensensillar bristles (length, 180  $\mu\text{m}$ ) followed distally by small tubercle bearing one short spine followed by depression with very short tubercle bearing one seta. Sensillum distinct on T- VIII, followed distally by two prominent tubercles, the first bearing three clusters of fine setae; the second smaller tubercle capped by short spine and several long, fine setae. Prominent anal seta positioned posterior to these tubercles (Figs. 7–9). Pair

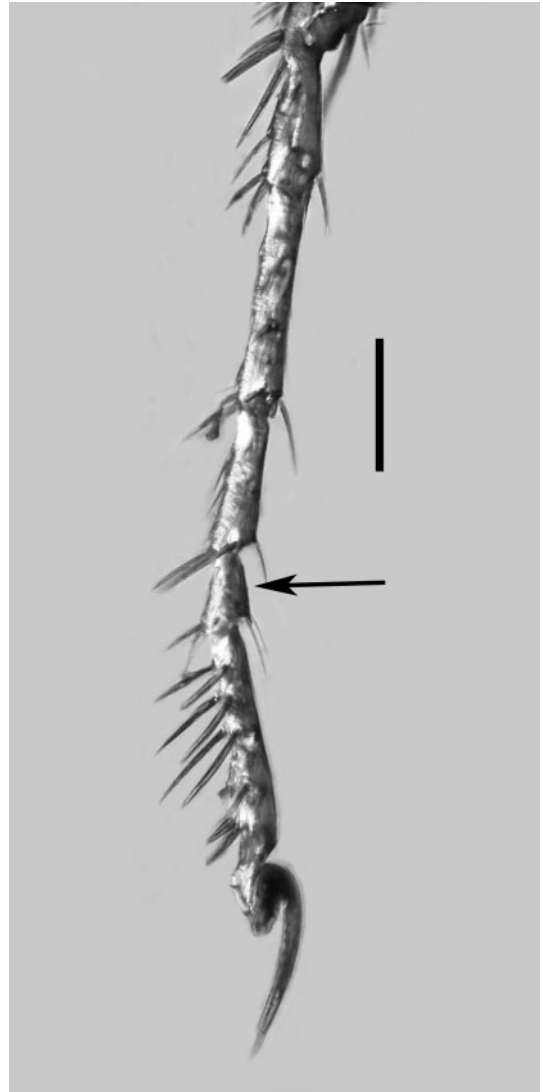

**Fig. 4.** Protarsus of *Atoposyllus cionus*, n. gen., n. sp. in Dominican amber. Scale bar = 83  $\mu\text{m}$ . Arrow shows reduced fourth segment.

of cerci-like organs (length, 130  $\mu\text{m}$ ) near the tip of abdomen on T- X (Figs. 8 and 9). Genitalia restricted to portion of *processus basimeris* (length, 140  $\mu\text{m}$ ) protruding from base of S. VIII (Fig. 7).

**Types.** Holotype male (accession number Sp-1-1) deposited in the Poinar amber collection maintained at Oregon State University, Corvallis, OR.

**Type Locality.** Amber mine in the northern mountain ranges (Cordillera Septentrional) of the Dominican Republic. DD latitude and longitude: 19.4, –70.4.

**Etymology.** The generic name is from the Greek “atopos” = strange and the Greek “psylo” = flea. The specific epithet is from the Greek “kion” = pillar in reference to the presence of a circus-like organ resembling an anal stylet that occurs on female fleas.

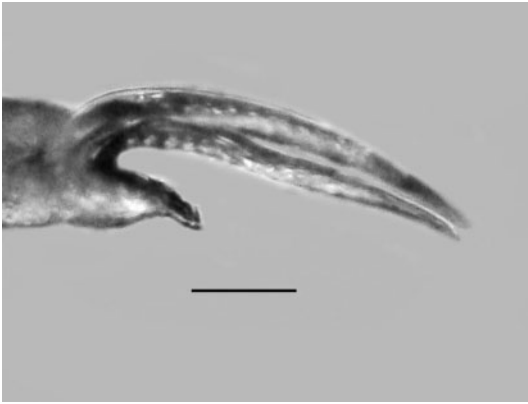

**Fig. 5.** Lateral view of mesotarsal claws of *Atopopsyllus cionus*, n. gen., n. sp. in Dominican amber. Scale bar = 32  $\mu\text{m}$ .

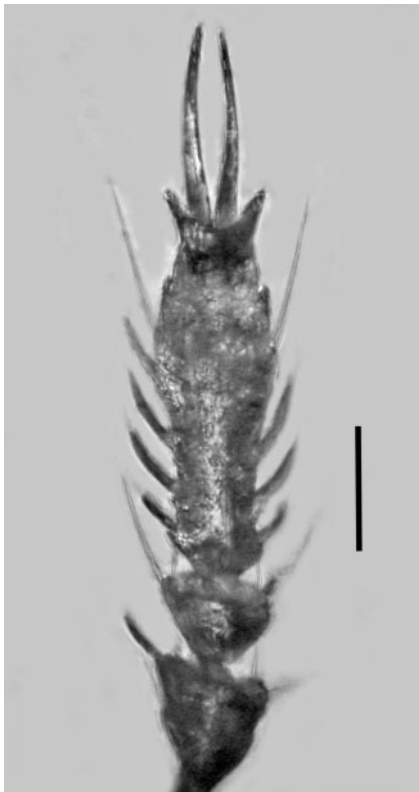

**Fig. 6.** Ventral view of mesotarsus of *Atopopsyllus cionus*, n. gen., n. sp. in Dominican amber. Scale bar = 50  $\mu\text{m}$ .

*Comments.* *Atopopsyllus cionus*, n. gen., n. sp. shares some features with the Dominican amber flea, *Eospilopsyllus kobberti* Perrichot, Beaucoumu and Velten (2012), such as the number and arrangement of spines on the tibia and tarsus. However, the shape of the body clearly separates the two species, that of

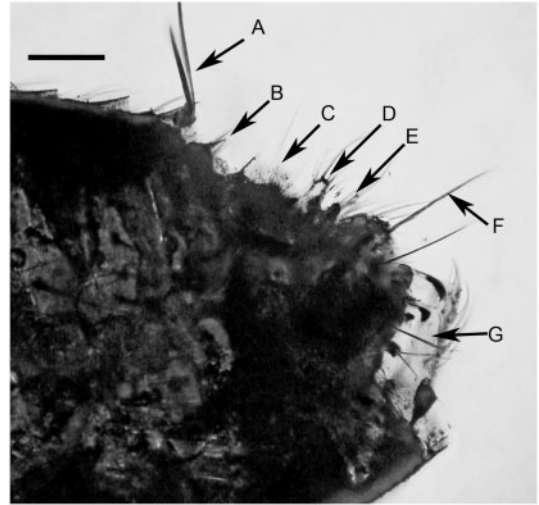

**Fig. 7.** Lateral view of terminal abdominal segments of *Atopopsyllus cionus*, n. gen., n. sp. in Dominican amber. Scale bar = 20  $\mu\text{m}$ . A—antesensilial bristles; B—short tubercle bearing spine; C—sensilium; D—large post-sensilium tubercle; E—small post-sensilium tubercle; F—anal seta; G—*processus basimeris*.

*E. kobberti* being essentially oval while that of *Atopopsyllus cionus*, n. gen., n. sp. is subrectangular. The new species also lacks the eight minute setae in a sinuous vertical row along the fronto-genal suture that are present in *E. kobberti*. *Atopopsyllus cionus*, n. gen., n. sp. also differs from both *E. kobberti* and the previously described *Pulex larimerius* Lewis and Grimaldi (1997) by its elongate protarsal segments, as the protarsal segments in the latter two species are relatively short and wide.

#### Associated Microorganisms

An examination of the rectum of *Atopopsyllus cionus*, n. gen., n. sp. revealed the presence of microorganisms. One is a trypanosome with cells ranging from 34 to 45  $\mu\text{m}$  in length. Some areas of the rectum were filled with large numbers of this protozoan (Fig. 10). Trypanosomes in fleas normally develop in the midgut, then invade and multiply in the gut cells, eventually breaking out and passing to the rectum where they are voided with the feces (Durden and Traub 2002).

Other microorganisms in the rectum are coccobacilli that are intermediate between spherical cocci and rod-shaped bacilli. They occur singly or in small groups, range from 2.0 to 5.0  $\mu\text{m}$  in diameter, and most are surrounded by faint opaque envelopes (Fig. 11). Attached to the tip of the epipharynx of the fossil flea is a small group of similar coccobacilli (Fig. 12). These coccobacilli fall within the size range (1.0–4.0  $\mu\text{m}$ ) of vertebrate pathogenic bacteria, including *Yersinia* spp., transmitted by extant fleas (Bercovier and Mollaret 1984; Durden and Traub 2002). While it is not possible to assign these fossil cells to any known genus of bacteria, it is interesting that of the pathogenic bacteria

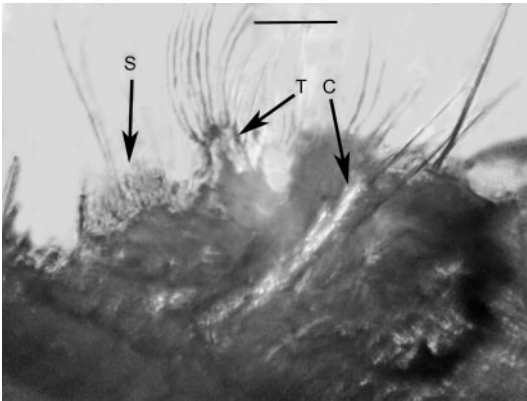

**Fig. 8.** Portion of abdominal tergites IX and X of *Atopopsyllus cionus*, n. gen., n. sp. in Dominican amber. Scale bar = 14  $\mu$ m. S, sensilium; T, large post-sensillum tubercle; C, cercus-like organ.

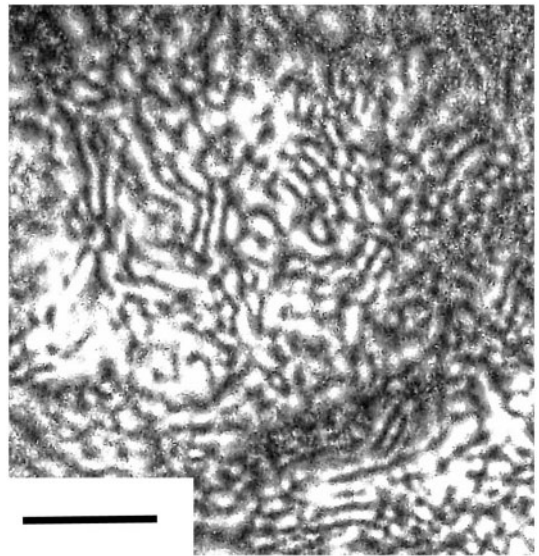

**Fig. 10.** A cluster of trypanosomes in the rectum of *Atopopsyllus cionus*, n. gen., n. sp. in Dominican amber. Scale bar = 56  $\mu$ m.

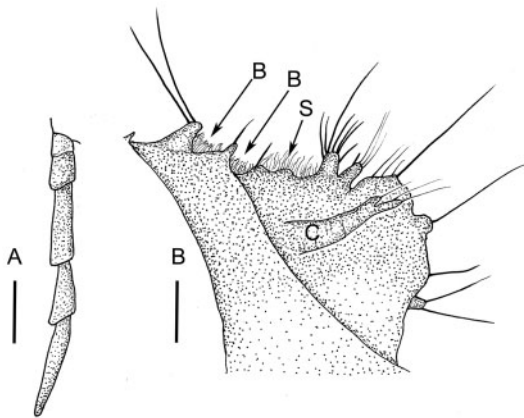

**Fig. 9.** *Atopopsyllus cionus*, n. gen., n. sp. in Dominican amber. (A) Maxillary palp. Scale bar = 76  $\mu$ m. (B) Portion of abdominal tergites IX and X with sensilium (S), cercus-like organ (C), and additional areas of sensory setae (B). Scale bar = 65  $\mu$ m.

transmitted by fleas today, *Yersinia* is the only one that forms both short rods and nearly spherical cells (Bercovier and Mollaret 1984).

### Discussion

The unique characters (five-segmented maxillary palps and cerci-like organs) of *Atopopsyllus cionus*, n. gen., n. sp. warrant its placement in a new tribe, the *Atopopsyllini* n. tribe. All extant fleas have four-segmented palps (Smit 1957), and this condition in the fossil shows that some ancient flea lineages had five-segmented maxillary palps. Kluge (2002) actually considered fleas as having five-segmented maxillary palps, although his fifth segment was the modified maxillary stipe. Mecoptera, considered the sister group to fleas and scorpionflies, are characterized by

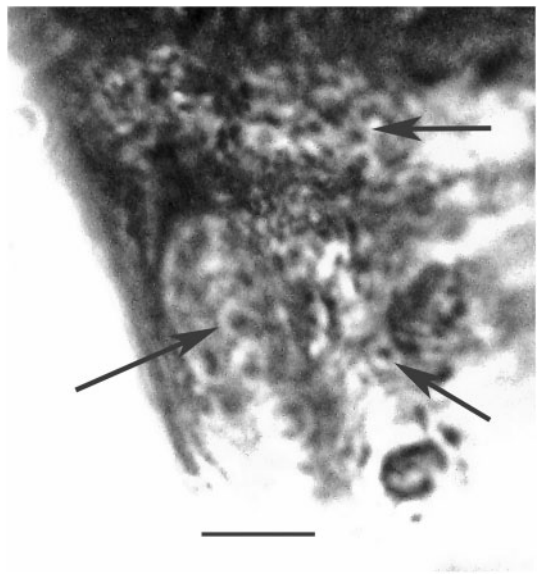

**Fig. 11.** Clusters of coccobacilli (arrows) in the rectum of *Atopopsyllus cionus*, n. gen., n. sp. in Dominican amber. Scale bar = 7  $\mu$ m.

five-segmented maxillary palps (Borror et al. 1989, Beutel et al. 2008, Whiting 2002).

The paired cerci-like organs near the tip of the abdomen are difficult to interpret (Figs. 8 and 9). Fleas lack cerci but female fleas have structures termed anal stylets that occur in roughly the same location as cerci in other insects. The anal stylet in fleas is an elongate structure behind the sensilium and bears one long apical seta and often one or more preapical small setae on each side of T-X (Smit 1957). In the fossil, the

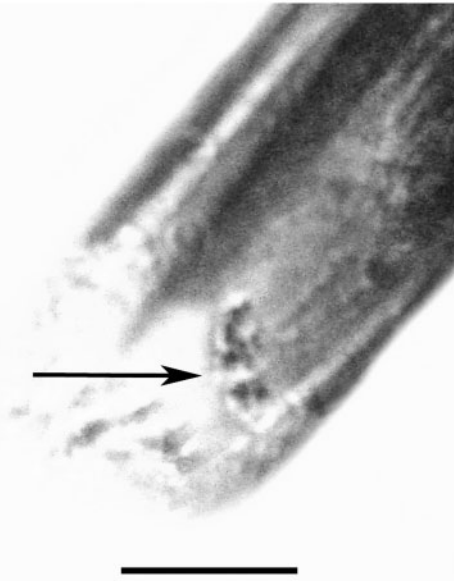

**Fig. 12.** A group of coccobacilli (arrow) adhering to the tip of the epipharynx of *Atopopsyllus cionus*, n. gen., n. sp. in Dominican amber. Scale bar = 35  $\mu$ m.

cerci-like organs are elongated, bifid subapically, and bear two elongate setae on the longer tip and a single seta on the shorter one. It is difficult to determine if this cercus-like organ corresponds to the female anal stylet. Similar structures could not be found on any extant or extinct male Siphonaptera (Smit 1957, Tipton and Méndez 1966, Tipton and Machado-Allison 1972, Lewis 1998, Lewis and Lewis 1985, Medvedev 1998).

The region of the sensilium on T-X contains additional diagnostic characters of *Atopopsyllus cionus*, n. gen., n. sp. including tubercles in front of and behind the sensilium. While the sensilium is usually confined to a “pocket” on the dorsum of fleas, in the fossil, sensilium-like elements also occur in depressions anterior to the sensilium (Fig. 9, arrows). These two depressions contain hair-like elements that probably served a tactile function.

Because extant spilopsylliid fleas parasitize mammals, this group of vertebrates probably also served as hosts to *Atopopsyllus cionus*, n. gen., n. sp. The long, nearly straight claws with minute projections must have been adapted for a specific group of hosts. Several mammalian groups that occurred in the Dominican amber forest based on hair and bone remains found in amber include *Hutia* rodents (Capromyidae), *Solenodon* insectivores, felines, and bats (Poinar and Poinar 1999, Poinar and Brown 2012).

A number of pathogenic trypanosomes occur in fleas and some are transmitted to rodents while others are thought to infect birds, shrews, voles, and rabbits (Durden and Traub 2002). It is impossible to determine if the trypanosomes or coccobacilli observed in the rectum or the coccobacilli on the epipharynx of

*Atopopsyllus cionus*, n. gen., n. sp. are symbionts or vertebrate parasites that were vectored by the fossil flea.

### Acknowledgments

I am grateful to Roberta Poinar for discovering the fossil flea and thank R. E. Lewis for discussions concerning various flea characters.

### References Cited

- Bercovier, H., and H. H. Mollaret. 1984.** *Yersenia* Van Loghem 1944, pp. 489–506. In N. R. Krieg and J. G. Holt (eds.), *Bergey's manual of systematic bacteriology*, Vol. 1. Williams and Wilkins, Baltimore.
- Beutel, R. G., F. Friedrich, and M. F. Whiting. 2008.** Head morphology of *Caurinus* (Boreidae, Mecoptera) and its phylogenetic implications. *Arthropod Struct. Dev.* 37: 418–433.
- Borror, D. J., C. A. Triplehorn, and N. F. Johnson. 1989.** An introduction to the study of insects, 6th edition. Saunders College Publishing, Philadelphia, PA.
- Brues, C. T., A. L. Melander, and F. M. Carpenter. 1954.** Classification of Insects. *Bull. Mus. Comp. Zool.* 108: 1–917.
- Draper, G., P. Mann, and J. F. Lewis. 1994.** Hispaniola, pp. 129–150. In S. Donovan and T. A. Jackson (eds.), *Caribbean geology: An introduction*. The University of the West Indies Publishers' Association, Kingston, Jamaica.
- Durden, L. A., and R. Traub. 2002.** Fleas (Siphonaptera), pp. 103–145. In G. Mullen and L. Durden (eds.), *Medical and veterinary entomology*. Academic Press, New York, NY.
- Iturralde-Vinent, M. A. 2001.** Geology of the amber-bearing deposits of the Greater Antilles. *Caribbean J. Sci.* 37: 141–167.
- Iturralde-Vinent, M. A., and R.D.E. MacPhee. 1996.** Age and Paleogeographic origin of Dominican amber. *Science* 273: 1850–1852.
- Kluge, N. J. 2002.** The homology of mouthparts in fleas (Insecta, Aphaniptera). *Entomol. Rev.* 82: 1020–1026.
- Lewis, R. E. 1998.** Resume of the Siphonaptera (Insecta) of the World. *J. Med. Entomol.* 35: 377–389.
- Lewis, R. E., and D. Grimaldi. 1997.** A pulcid flea in Miocene amber from the Dominican Republic (Insecta: Siphonaptera: Pulicidae). *Am. Mus. Novit.* 3205: 1–9.
- Lewis, R. E., and J. H. Lewis. 1985.** Notes on the geographical distribution and host preferences in the order Siphonaptera. *J. Med. Entomol.* 22: 134–152.
- Medvedev, S. G. 1998.** Classification of fleas. (Order Siphonaptera) and its theoretical foundations. *Entomol. Rev.* 78: 1080–1093.
- Perrichot, V., J.-C. Beaucourmu, and J. Velten. 2012.** First extinct genus of a flea (Siphonaptera: Pulicidae) in Miocene amber from the Dominican Republic. *Zootaxa* 3438: 54–61.
- Poinar, G. O. Jr. 1991.** *Hymenaea protera* sp. n. (Leguminosae: Caesalpinioideae) from Dominican amber has African affinities. *Experientia* 47: 1075–1082.
- Poinar, G. O. Jr. 1995.** Fleas (Insecta: Siphonaptera) in Dominican amber. *Med. Sci. Res.* 23: 789.
- Poinar, G. O. Jr., and R. Poinar 1999.** The amber forest. Princeton University Press, Princeton, NJ.
- Poinar, G. Jr., and A. Brown 2012.** The first fossil streblid bat fly, *Enischomyia stegosoma* n. g. n. sp. (Diptera: Hippoboscidae: Streblidae). *Syst. Parasitol.* 81: 79–86.
- Schlee, D. 1990.** Das Bernstein-Kabinett. *Stuttgarter Beitrage Naturkunde Ser. C* 28, p. 100.

- Smit, F.G.A.M. 1957.** Siphonaptera, pp. 1–99. Handbooks for the identification of British insects Vol. 1, part 16, Royal Entomol. Soc. London, United Kingdom.
- Tipton, V. J., and E. Méndez. 1966.** The fleas (Siphonaptera) of Panama, pp. 289–338. *In* R. L. Wenzel and V. J. Tipton (eds.), Ectoparasites of Panama. Field Museum of Natural History, Chicago.
- Tipton, V. J., and C. E. Machado-Allison. 1972.** Fleas of Venezuela. Brigham Young University Sci. Bull. (Biol. Sci.) 17: 1–115.
- Whiting, M. F. 2002.** Mecoptera is paraphyletic: Multiple genes and phylogeny of Mecoptera and Siphonaptera. *Zool. Scripta* 31: 93–104.
- Zhu, Q., M. W. Hastriter, M. F. Whiting, and K. Dittmar. 2015.** Fleas (Siphonaptera) are Cretaceous, and evolved with Theria. *Mol. Phy. Evol.* 90: 129–139.

*Received 9 June 2015; accepted 13 August 2015.*

---
